# Supplementary material for: A Transcriptional Sequencing Analysis of Islet Stellate Cell and Pancreatic Stellate Cell
Source: Hindawi journal article supplement (doi:10.1155/2018/7361684), 2018-01-01
Supplement: f1 [file 7361684.f1.pdf]

**Table S1 The primers of validated genes.**

| Gene    | Forward primer       | Reverse primer         |
|---------|----------------------|------------------------|
| Col11a1 | CTATTGGTTCAGTTGGTGGT | CCTTTCTCTCCTCTCTCTCC   |
| Plscr2  | ACTCAACTCACTTGGAGCCG | TTGGAAAGCTGCTGGTGGAT   |
| Card10  | CTCAGAGCTAGAGCGAAGCC | AGATTGCGGATAAGGCGAGG   |
| Ldb2    | CAGCAAGAAGAAGACCACA  | CAAACCTCACCTCCCATCA    |
| Bin2    | GAGCAAACCTGGAGAAGCA  | GGGGAGAGATGACTAAGGAG   |
| Arrb1   | TTGTGTTTGAGGACTTTGCT | CTATCTGTTGTTGAGGTGTGG  |
| Prex2   | ACTGGAGCAAGCCATCACTC | AGGAGTCCGGTCTCTAACCC   |
| Ebf2    | ATGTGCTGGCTGTTTCTG   | CTTGGACTGATGGCTTTG     |
| Tnnc1   | CAAAGGGAAGTCTGAGGAG  | CAGTTCATCCAAGTCAATGTAG |
| Actg2   | TAAAGCCAACAGGGAGAAG  | GCATAGAGCGAGAGCACA     |
| Gapdh   | TCTCTGCTCCTCCCTGTTC  | ACACCGACCTTCACCATCT    |
